# Supplementary material for: Investigation of Risk Factors for Postoperative Delirium after Transcatheter Aortic Valve Implantation: A Retrospective Study
Source: MDPI journal article supplement (doi:10.3390/jcm11123317), 2022-06-09
Supplement: s1 [file s1]

**Supplementary Table S1.** The Frailty index based on the Cardiovascular Health Study (CHS) Index.

| Question                                                      | Score       |
|---------------------------------------------------------------|-------------|
| 1) Have you lost 2 kg or more in the past 6 months?           | Yes = 1 pt. |
| 2) Do you think you walk slower than before?                  | Yes = 1 pt. |
| 3) Do you go for a walk for your health at least once a week? | Yes = 1 pt. |
| 4) Can you recall what happened 5 minutes ago                 | No = 1 pt.  |
| 5) In the past 2 weeks, have you felt tired without reason?   | Yes = 1 pt. |

The scale was adapted from the study by Yamada et al [12].

Decision:  $\geq 3$  points, frail; 1–2 points, prefrail; and 0 points, robust.
